# Supplementary material for: Closed-loop network of skin-interfaced wireless devices for quantifying vocal fatigue and providing user feedback
Source: PubMed Central journal article supplement — Proc Natl Acad Sci U S A. 2023 Feb 21;120(9):e2219394120. doi: 10.1073/pnas.2219394120 (PMC9992836; doi:10.1073/pnas.2219394120), 2023-02-21
Supplement: pnas.2219394120.sapp.pdf [file pnas.2219394120.sapp.pdf]

1  
2  
3  
4  
5  
6  
7  
8  
9

## Supporting Information for

Closed-Loop Network of Skin-interfaced Wireless Devices for Quantifying Vocal Fatigue and Providing User Feedback

10 Hyoyoung Jeong, Jae-Young Yoo, Wei Ouyang, Aurora Lee Jean Xue Greane, Alexandra Jane  
11 Wiebe, Ivy Huang, Young Joong Lee, Jong Yoon Lee, Joohee Kim, Xinchun Ni, Suyeon Kim,  
12 Huong Le-Thien Huynh, Isabel Zhong, Yu Xuan Chin, Jianyu Gu, Aaron M. Johnson, Theresa  
13 Brancaccio\*, and John A. Rogers\*

14

15 \* Corresponding author: John A. Rogers

16 **Email:** jrogers@northwestern.edu

17

18

19 **This PDF file includes:**

20

21 Supporting text  
22 Figures S1 to S17  
23 Legends for Movies S1  
24 Legends for Audio S1  
25 SI Reference

26 **Supporting Information Text**

27 **Quantifying the performance of the adhesives.** A Mark-10 Force Gauge enabled comparisons  
28 of peel forces of four different adhesives on the skin. Similar measurements determined the forces  
29 for removing the sensors from the magnetic adhesive when attached to the skin. *SI Appendix*, Fig.  
30 S5 shows an image of the four adhesives tested: hydrogel, magnetic adhesive, fabric-based tape  
31 with MED6500 adhesive, and the medical silicone adhesive. Peel forces are shown in *SI Appendix*,  
32 Fig. S6. Removing the device from the magnetic adhesive and the hydrogel required the lowest  
33 maximum peel force. The sharp steps in the force graph for removing the device from the magnetic  
34 adhesives resulted from the device detaching sequentially from each magnet. The magnetic  
35 adhesive with fabric-based tape for the skin interface demonstrated a moderate maximum peel  
36 force and slope. The medical silicone adhesive (3M, 2477P) and the fabric-based tape coupled  
37 with the MED6500SI adhesive had the highest maximum peel forces and greatest initial slopes. *SI*  
38 *Appendix*, Fig. S7 shows images of a participant's skin at the suprasternal notch area to compare  
39 redness at three time points (twenty minutes, forty minutes, and sixty minutes) after adhesive  
40 removal. The images demonstrate decreasing redness of the skin from moderate at twenty minutes  
41 to none at sixty minutes. The results of adhesive validation testing indicate that most users found  
42 the adhesives easy to use and comfortable. Based on these results, the adhesive comprised of  
43 fabric-based tape coupled with a MED6500 adhesive was chosen as the adhesive for continuous  
44 monitoring for at least a day at a time.

45  
46 **Verifying calculated vocal dose and perceived effort.** In studies to verify that the vocal dose  
47 algorithm aligned with perceived effort, four singers (soprano, alto, tenor, and baritone) recorded a  
48 set of known tasks. The tasks included normal speaking, speaking over 60 dB SPL of ambient  
49 noise, whispered speaking, moderate singing (low to mid-range), moderately loud singing (mid to  
50 high range), loud singing (low to mid-range), very loud singing (mid to high range), singing without  
51 vibrato (low to mid-range), staccato arpeggios throughout the vocal range, and strained speaking.  
52 Participants rated their perceived vocal effort on a scale from one to ten (1 = no effort, 10 =  
53 maximum effort). Each task was recorded for one minute with one minute of rest in between.

54  
55 **Aligning sensor data with self-reported activities.** Sixteen university singers, seven male and  
56 eight female wore the MA device affixed just below the suprasternal notch and recorded all of their  
57 daily vocal use. The singers wore the devices for between one day and five consecutive days,  
58 removing them only to shower and sleep. Each simultaneously recorded their activities and self-  
59 assessments on various surveys throughout each day. Each participant began and ended the day  
60 with vocal fold "Swelling Check" exercises as a barometer of vocal function (1). The exercises  
61 expose vocal fold mucosal swelling through singing quietly in the topmost part of their vocal range.  
62 The highest pitch that the participant could no longer phonate clearly and softly defined the "ceiling  
63 pitch". Participants reported the number of hours they slept along with their perceived quality of  
64 sleep, and their morning ceiling pitch in a survey each day. Their morning swelling checks were  
65 additionally recorded in a voice memo as a WAV file and uploaded to a cloud drive. Throughout  
66 the day, participants completed multiple brief surveys, documenting the start and end time of each  
67 unique vocal activity, as well as their perceived vocal effort for said activity. These activities  
68 included speaking, solo singing, choral singing, quiet time, teaching, opera rehearsal and an option  
69 to specify a type of activity that was not already listed. Every evening, at the completion of the  
70 day's activities, participants performed both swelling checks and recorded the results in a voice  
71 memo, reported their ceiling pitch in a survey, and then removed the device. The data was then  
72 downloaded from the device to the smartphone.

73  
74

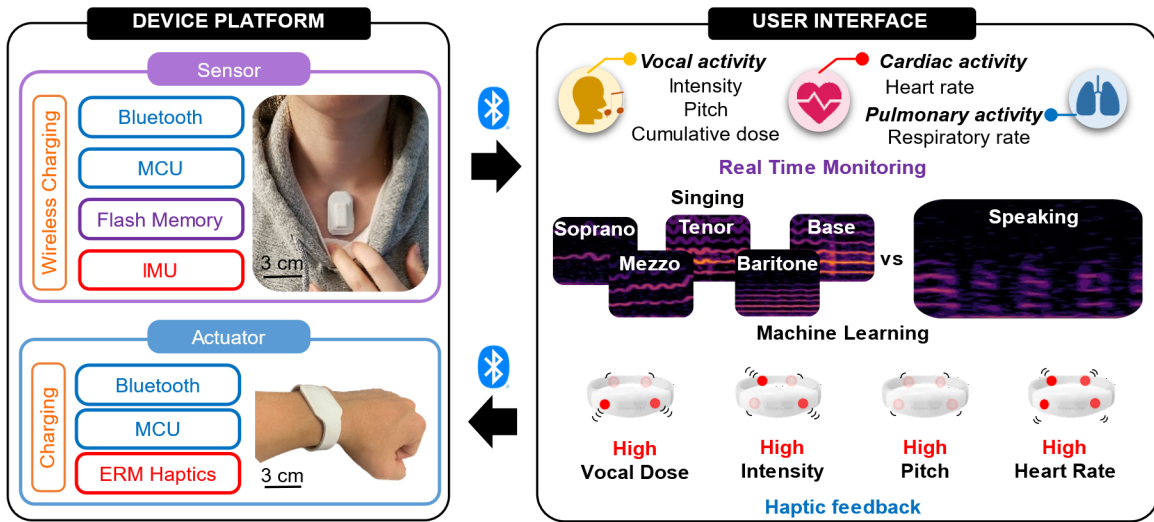

75

76

77

**Fig. S1.** An illustration of the overall platform operation including sensor, user interface, and feedback actuator.

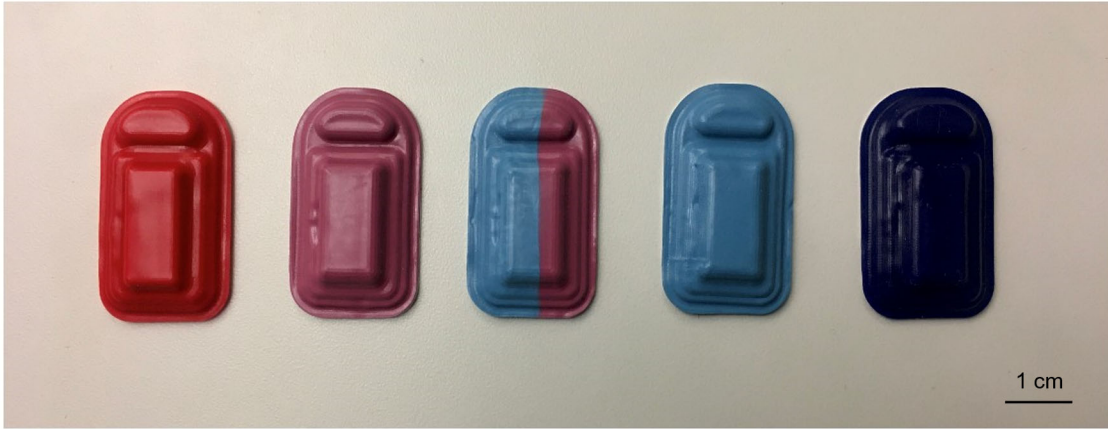

78

79 **Fig. S2.** Devices packaged in various colors to promote user identification of devices on the mobile  
80 application.

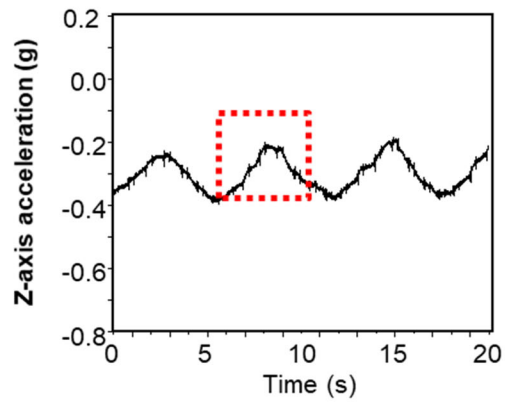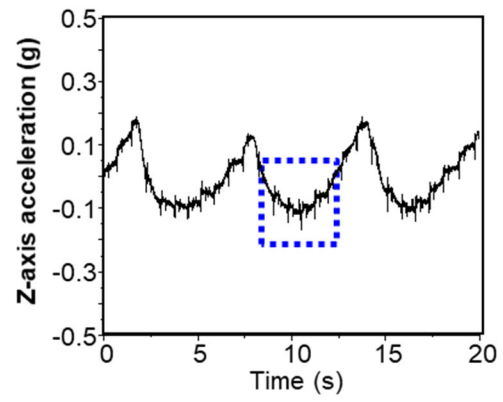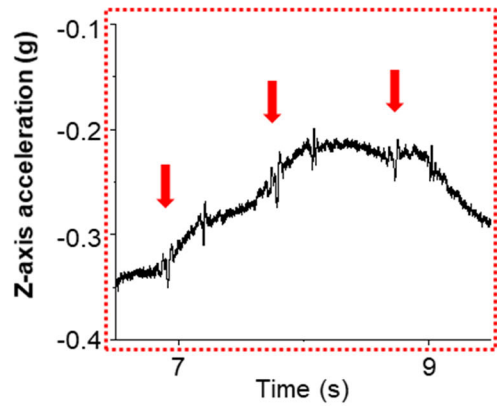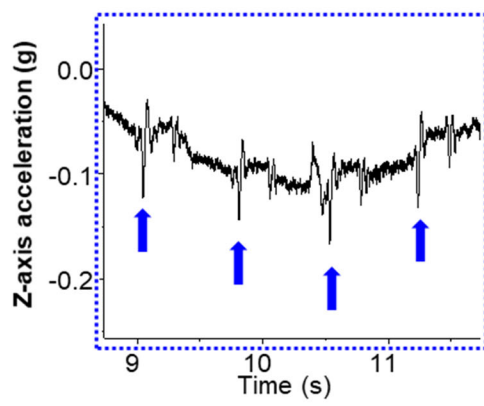

**Double-sided medical silicone adhesive**

**Magnetic adhesive**

81

82 **Fig. S3.** Data collected using different adhesives during trials with subjects at rest. The bottom  
 83 graphs are magnified sections of the top graphs to show that seismocardiogram signals are  
 84 detectable using both adhesives.

85

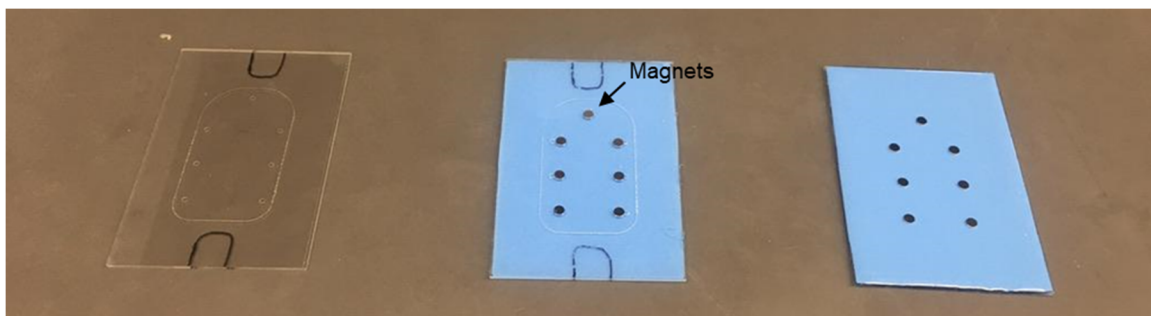

86

87 **Fig. S4.** Fabrication of the bottom encapsulation layer of the device with magnetic adhesives.

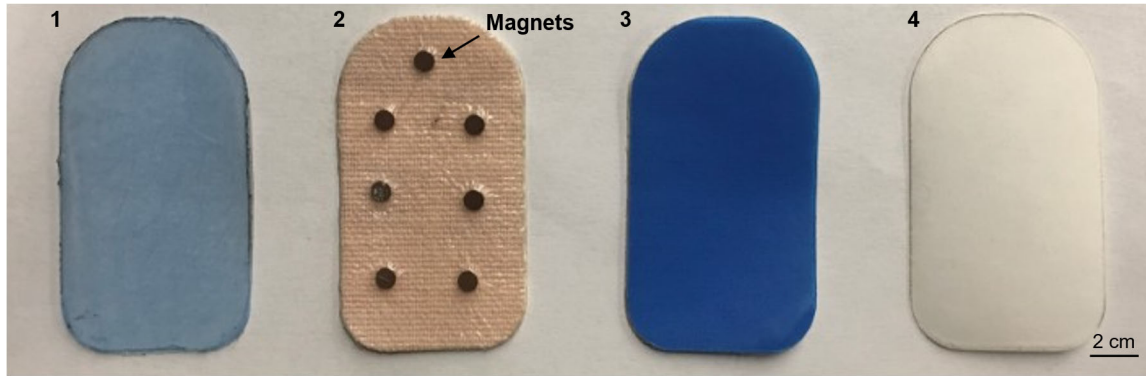

Hydrogel

Kinesiology tape  
+ Magnets

Kinesiology tape  
+ soft silicone tape

Double sided medical  
silicone tape

88

89 **Fig. S5.** Various adhesives tested for skin comfort and redness after removal. The leftmost  
90 adhesive is a hydrogel tape (KM 40A, KATECHO) alone. The second from the left is a combination  
91 of kinesiology tape (SpiderTech, Nitto Denko) and magnets sealed with Tegaderm (3M). The  
92 second from the right is a combination of kinesiology tape and a soft silicone adhesive (MED6500SI,  
93 Avery Dennison). The rightmost adhesive is the medical silicone tape (2477P, 3M).

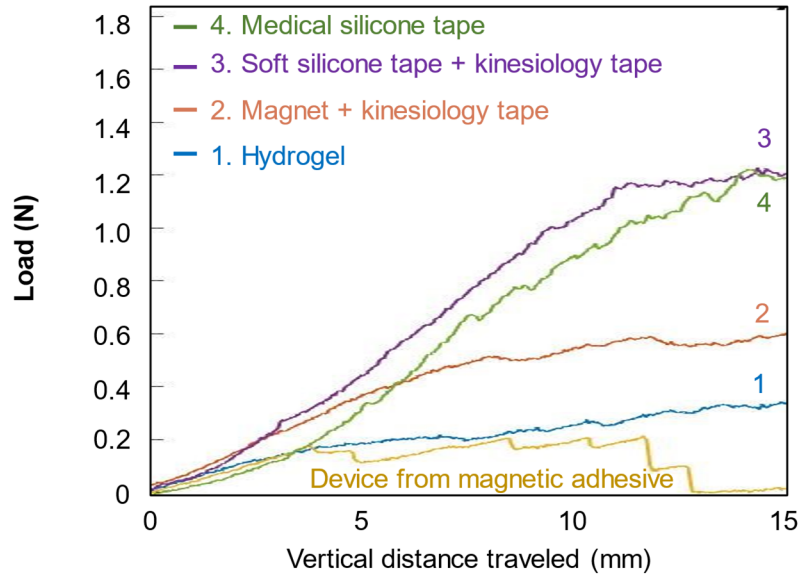

94

95 **Fig. S6.** Peel forces for four adhesives on the skin (labeled 1 to 4) and for removal of a device from  
96 the magnetic adhesive.



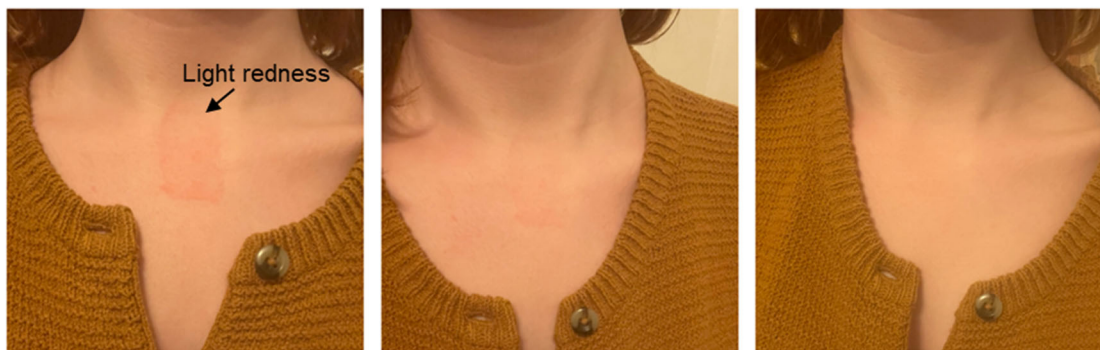

20 min

40 min

60 min

97

98

**Fig. S7.** Images of skin redness at three time points after adhesive removal.

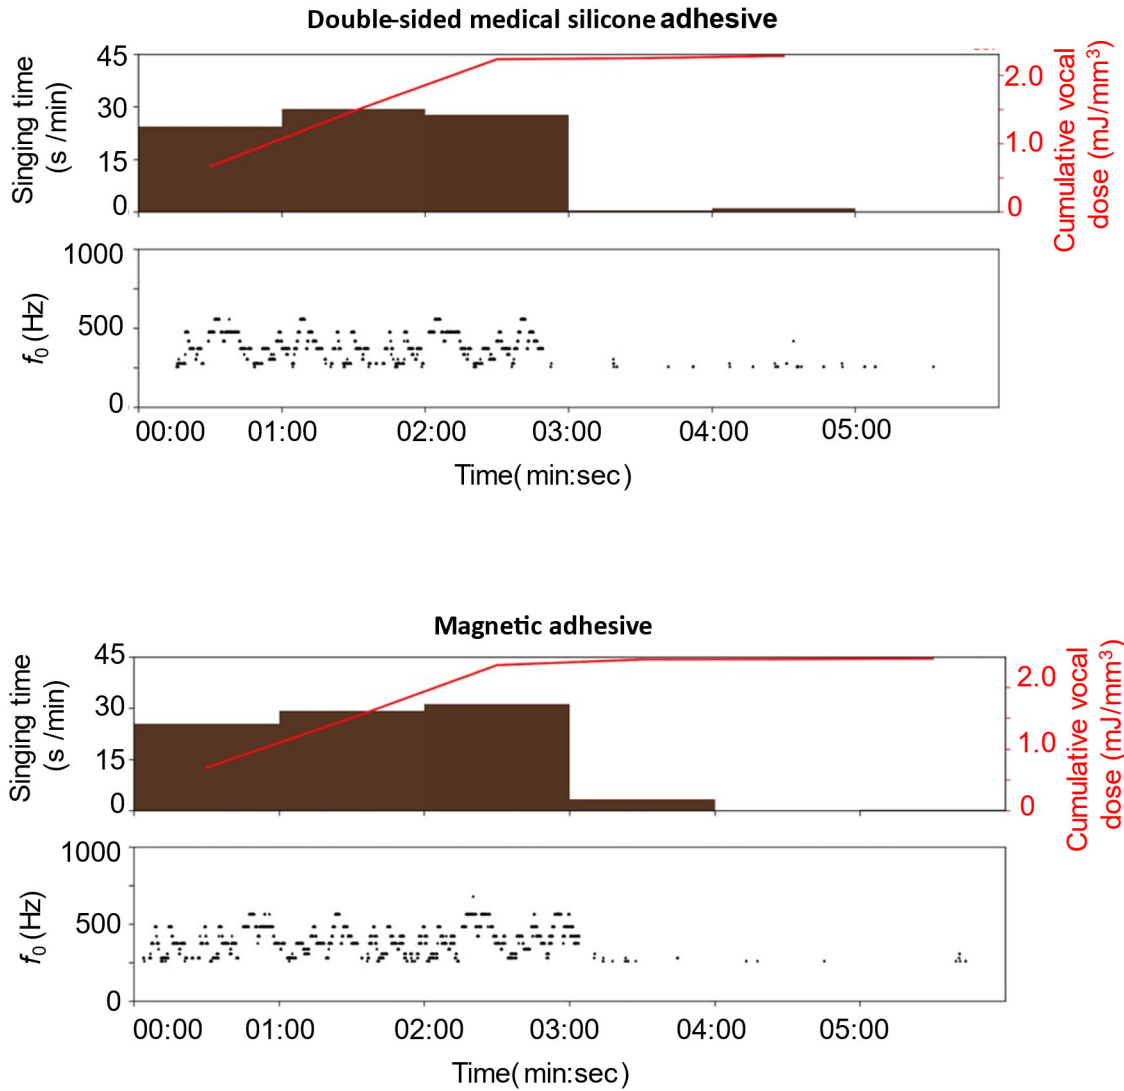

99

100 **Fig. S8.** Comparison of data collected from devices coupled to the body using a magnetic adhesive  
 101 and a non-magnetic adhesive. Data from the two devices yielded similar values for singing time,  
 102 cumulative dose, and fundamental frequency during three minutes of speaking and three minutes  
 103 of singing.

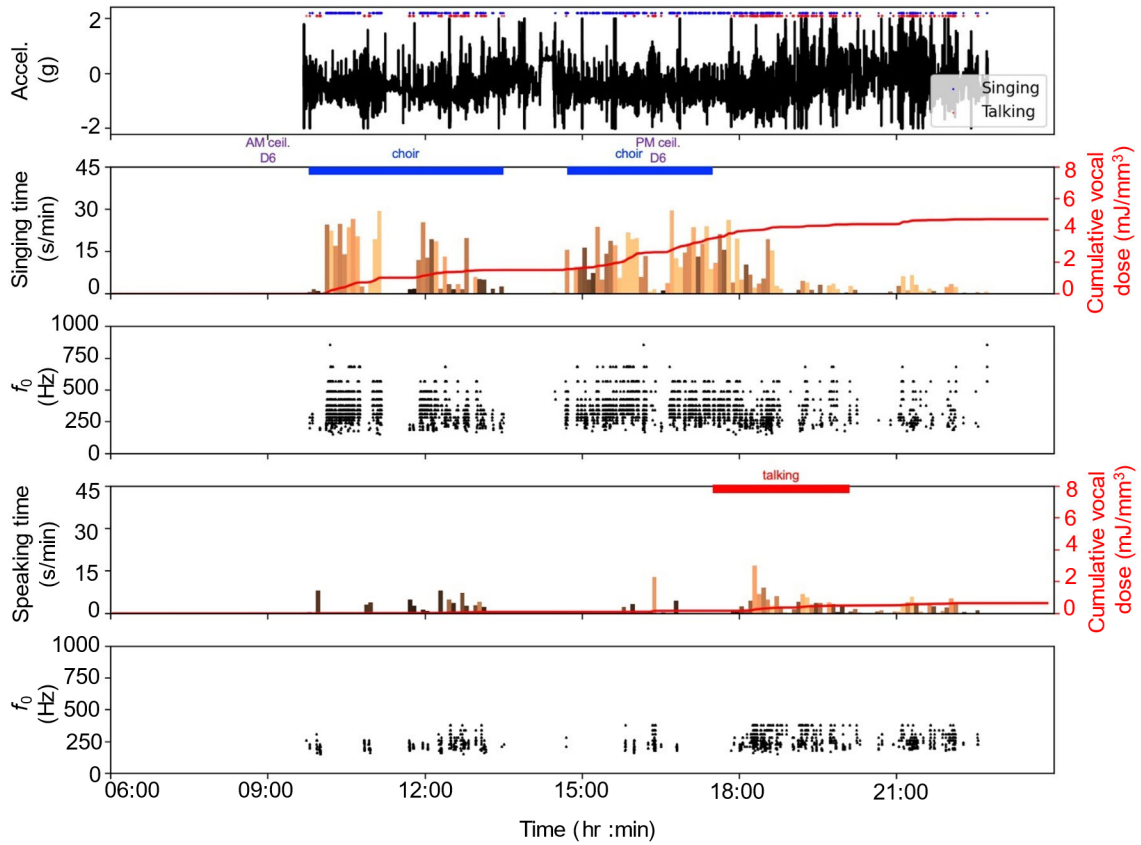

104

105 **Fig. S9.** Data from a mezzo-soprano with self-reported activities noted.

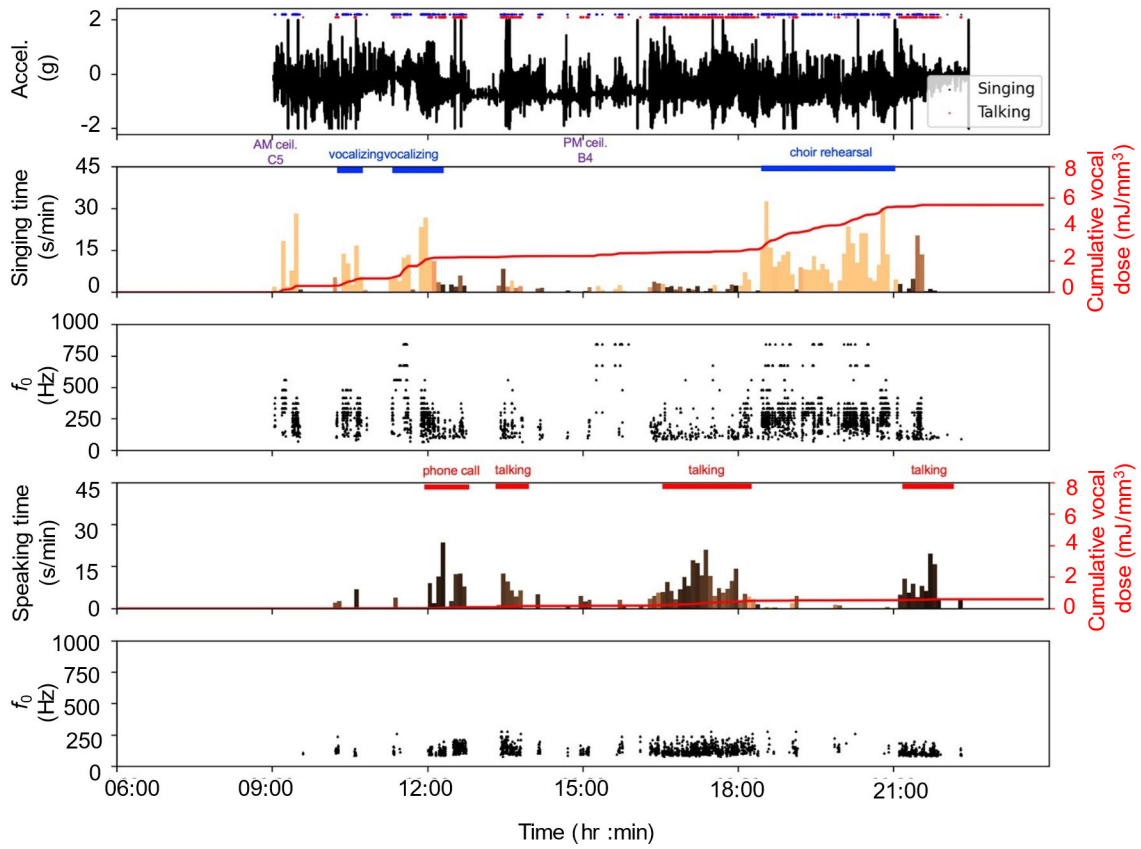

106

107

**Fig. S10.** Data from a tenor with self-reported activities noted.

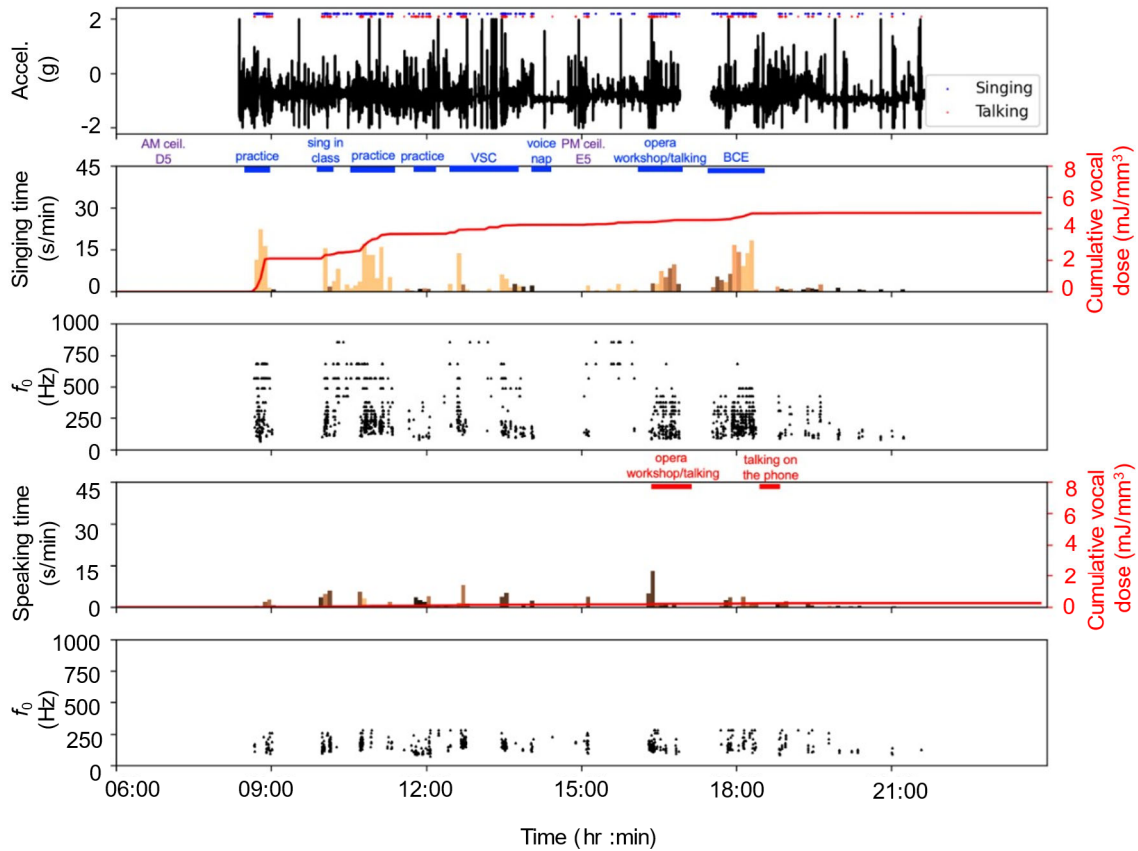

108

109

**Fig. S11.** Data from a baritone with self-reported activities noted.

110

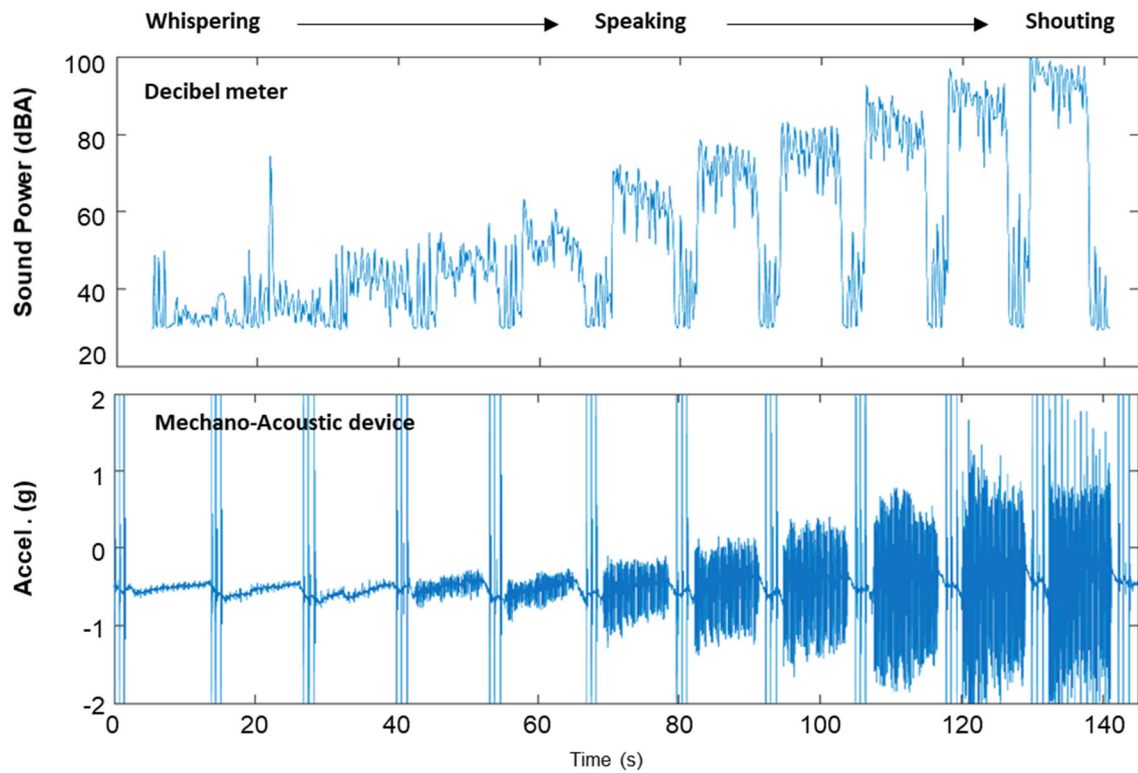

111

112 **Fig. S12.** Raw data for calibration of mechano-acoustic power and acoustic power. Note that the  
 113 tapping signals between transitions causes saturated acceleration values.

114

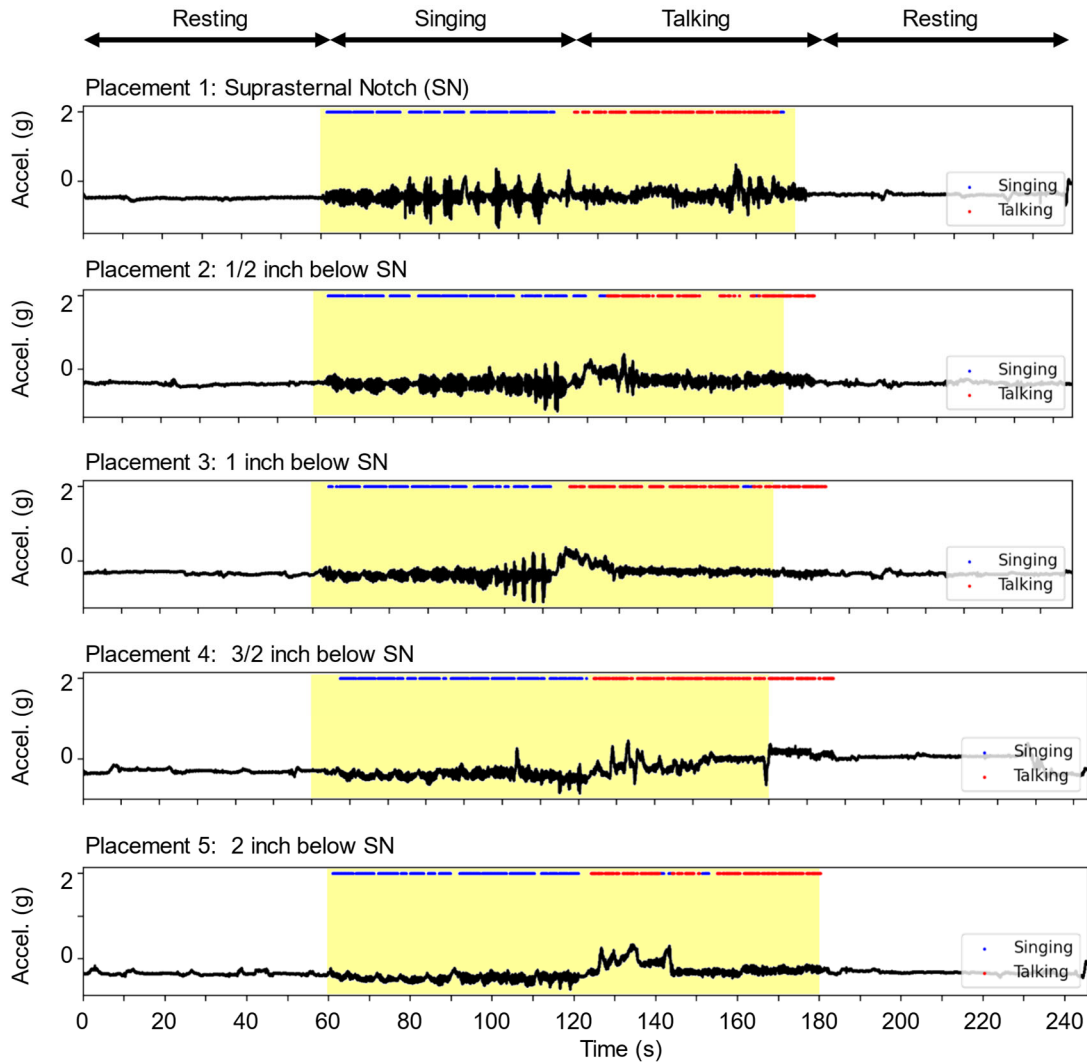

115

116 **Fig. S13.** Comparison of singing and speaking classification by the CNN model from the data  
 117 collected with five different placements: suprasternal notch (SN), 0.5 inches below SN, 1 inch below  
 118 SN, 1.5 inches below SN, and 2 inches below SN. Blue and red dot denotes classified singing and  
 119 talking events.

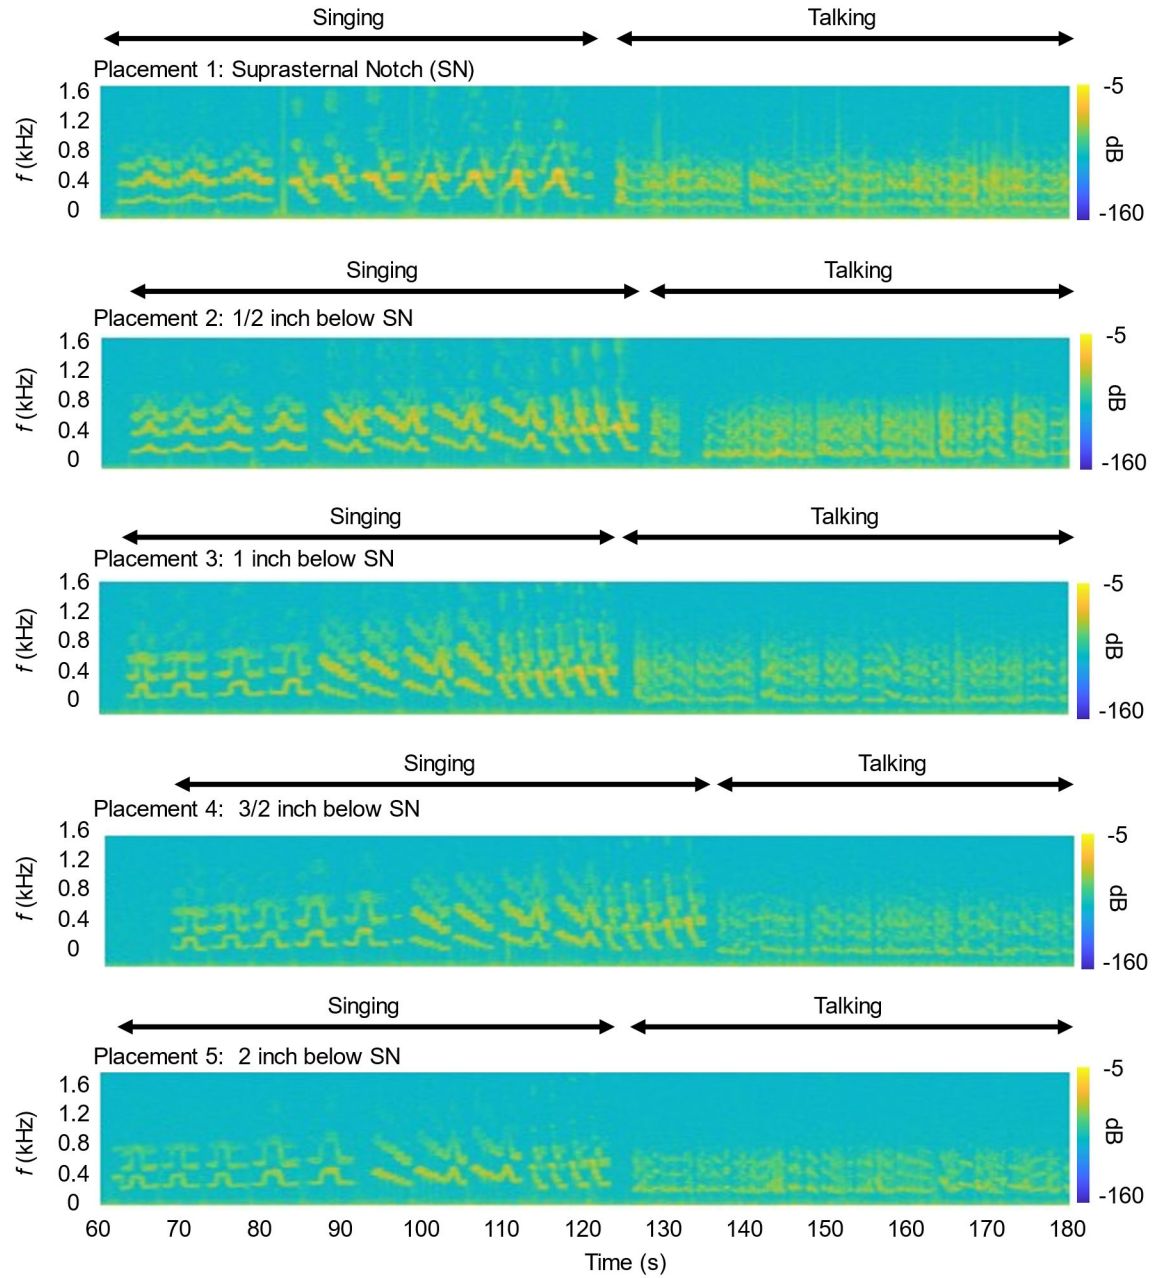

120

121

122

**Fig. S14.** Comparison of spectrograms for singing and speaking data highlighted in the data from Fig. S13



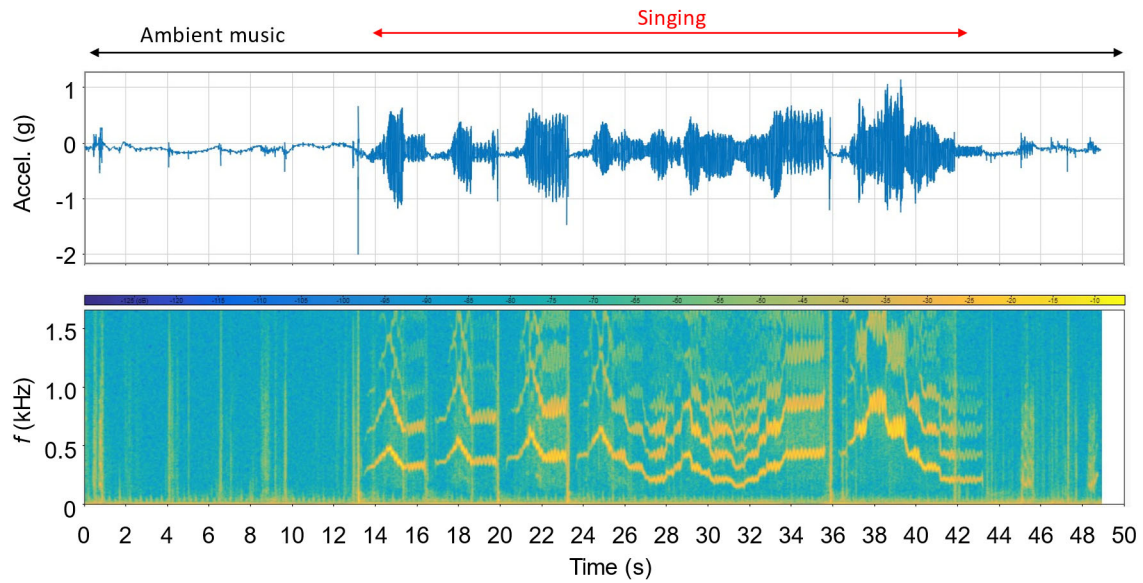

123

124 **Fig. S15.** Validation of interference by ambient noise. The subject wore an MA device on the upper  
 125 chest. Data were collected with ambient loud music (Beethoven Symphony No. 9, 62 - 79 dBA  
 126 range) while singing with different ranges of pitch.

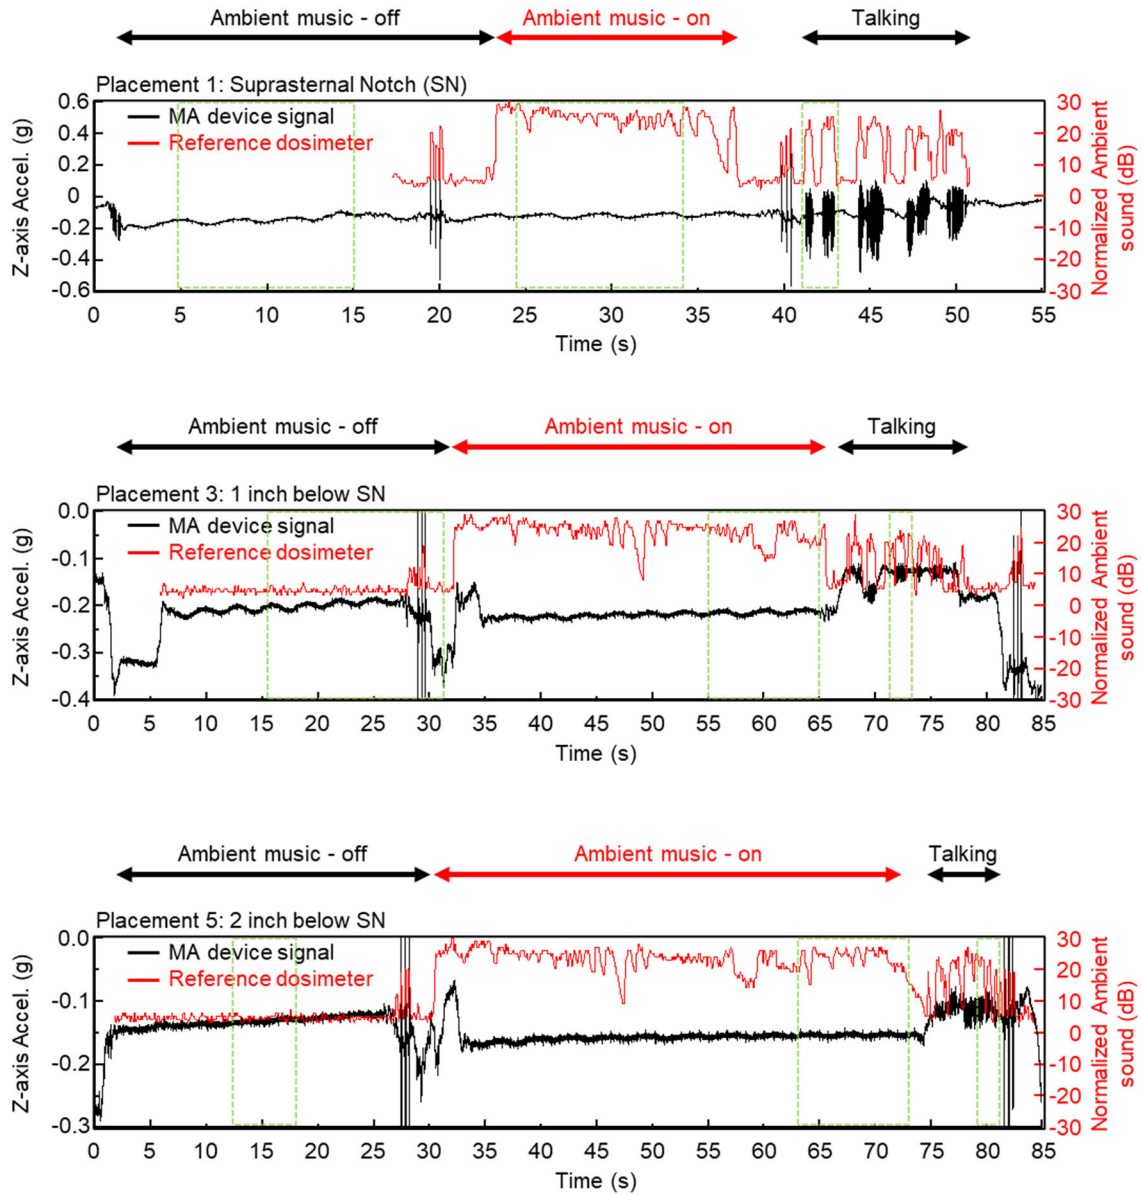

127

128 **Fig. S16.** Comparison of data collected in a noisy environment at three different locations including

129 suprasternal notch (SN), 1 inch below SN, and 2 inches below SN.

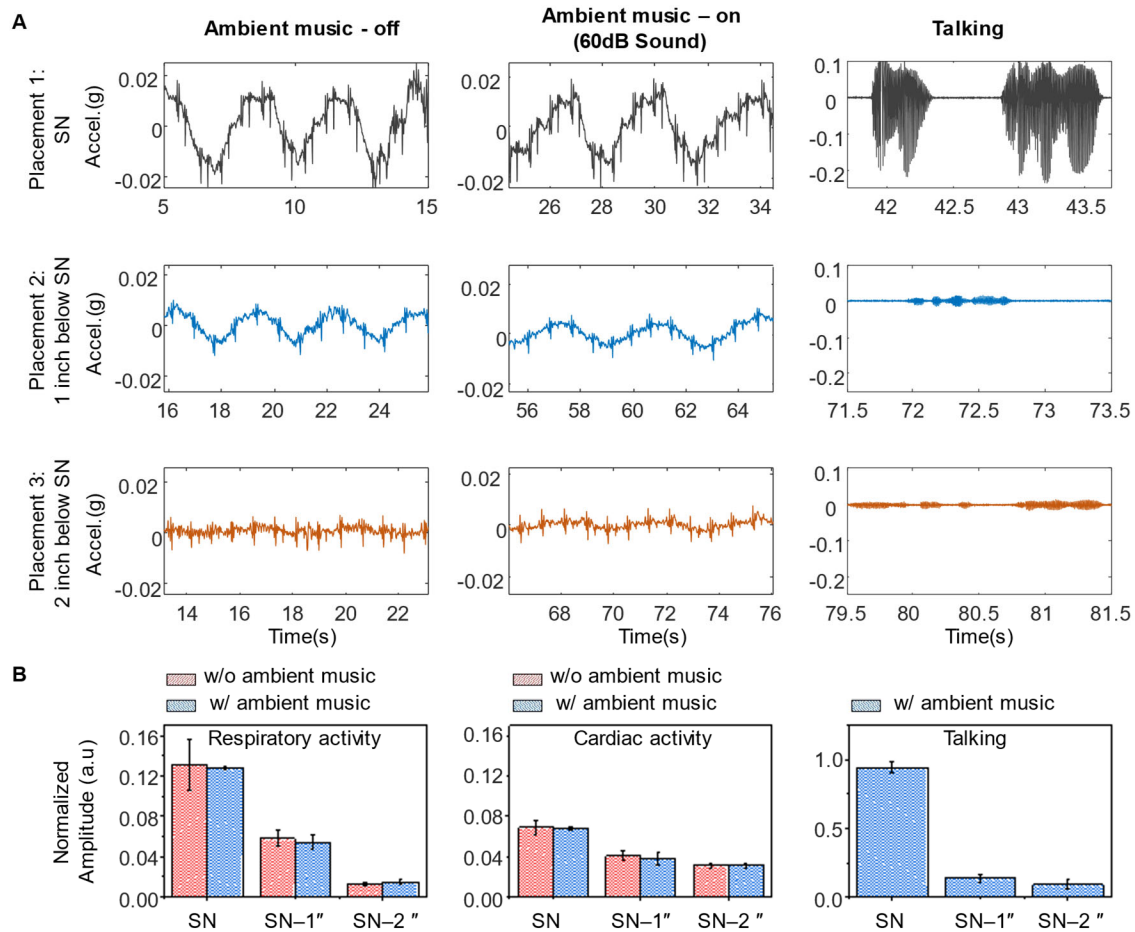

130

131 **Fig. S17.** Quantitative comparison of signal-to-noise ratio (SNR) collected in a noisy environment  
 132 at three different locations including suprasternal notch (SN), 1 inch below SN, and 2 inches below  
 133 SN. (A) Zoom-in signals from green region in Fig. S16. (B) Normalized signal amplitude from three  
 134 different placements in terms of respiratory activity, cardiac activity, and talking signal after data  
 135 processing.

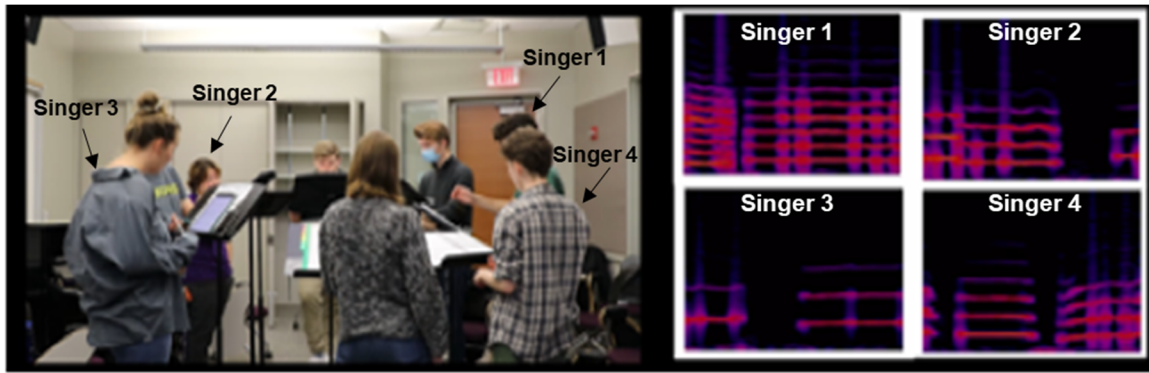

136  
137  
138  
139  
140  
141

**Movie 1.** Devices used in a choir rehearsal setting demonstrate the capacity to capture data from an individual singer without influence from vocalization by other singers. The studies involve four singers (one soprano, one alto, one tenor, and one bass) during a rehearsal, with devices paired with smartphones or tablets for real-time dosimetry calculations.

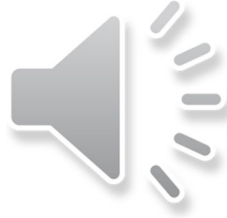

142  
143  
144  
145

**Audio 1.** Validation of interference by ambient noise with converted audio. Converting the MA data (Fig. S15) to audio files confirmed that the influence of ambient music is almost negligible.

146 **SI Reference**

147

- 148 1. R. W. Bastian, A. Keidar, K. Verdolini-Marston, Simple vocal tasks for detecting vocal fold  
149 swelling. *J. Voice* **4**, 172–183 (1990).
